# Supplementary material for: Cobalt-doped MIL-88A anchored on a cellulose filter paper: a recyclable flow-through catalyst for peroxymonosulfate activation during the degradation of organic dyes
Source: Royal Society of Chemistry journal article supplement (doi:10.1039/d5cy00412h), 2025-01-01
Supplement: d5cy00412h1.pdf [file d5cy00412h1.pdf]

## **Supporting information**

### **Cobalt-Doped MIL-88A Anchored on Cellulose Filter Paper: A Recyclable Flow-Through Catalyst for Peroxymonosulfate Activation in the Degradation of Organic Dyes**

Yaru Li <sup>a§</sup>, Jing-jing Shao <sup>a§</sup>, Thomas L. Eberhardt <sup>b</sup>, Hui Pan <sup>a,\*</sup>

<sup>a</sup>Jiangsu CoInnovation Center for Efficient Processing and Utilization of Forest Resources, Nanjing Forestry University, 159 Longpan Road, 210037, Nanjing, PR China

<sup>b</sup>USDA Forest Service, Forest Products Laboratory, One Gifford Pinchot Drive, Madison, WI 53726, USA

<sup>§</sup>Yaru Li and Jing-jing Shao contributed equally to this work.

\*Corresponding authors.

E-mail addresses: [Hpan@njfu.edu.cn](mailto:Hpan@njfu.edu.cn) (H. Pan)

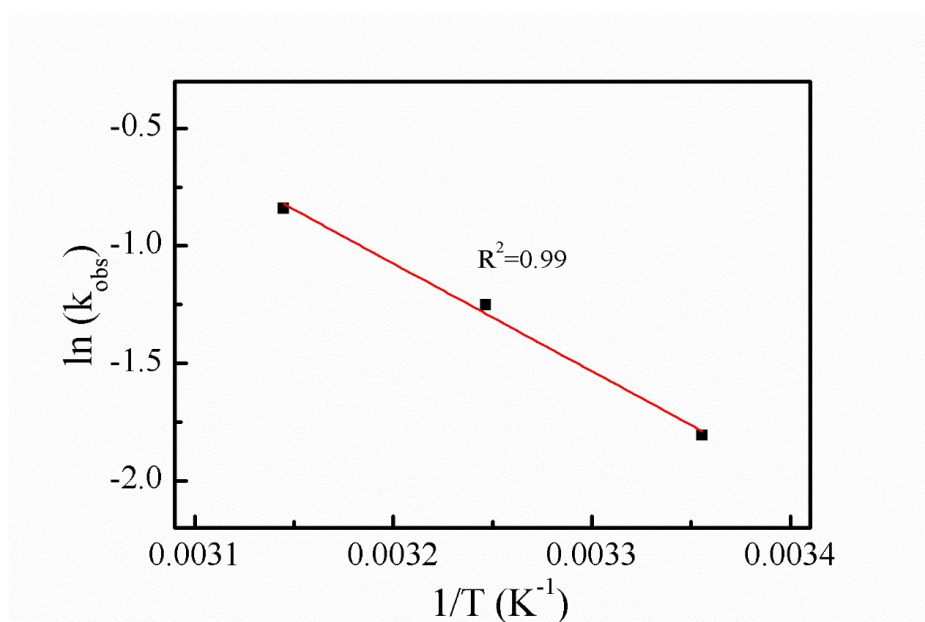

**Fig. S1.** The arrhenius curve of Co-M88A-FP/PMS system

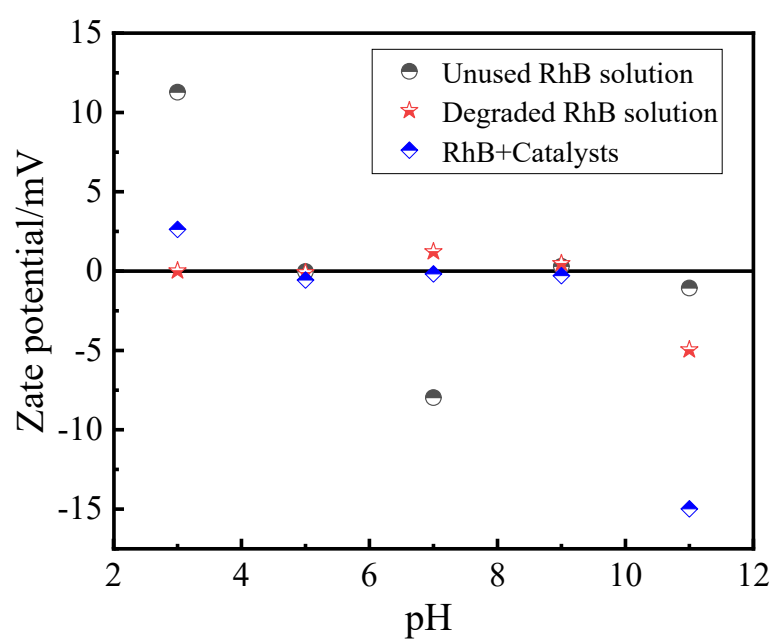

**Fig. S2.** Zate potential test of RhB solution before and after degradation

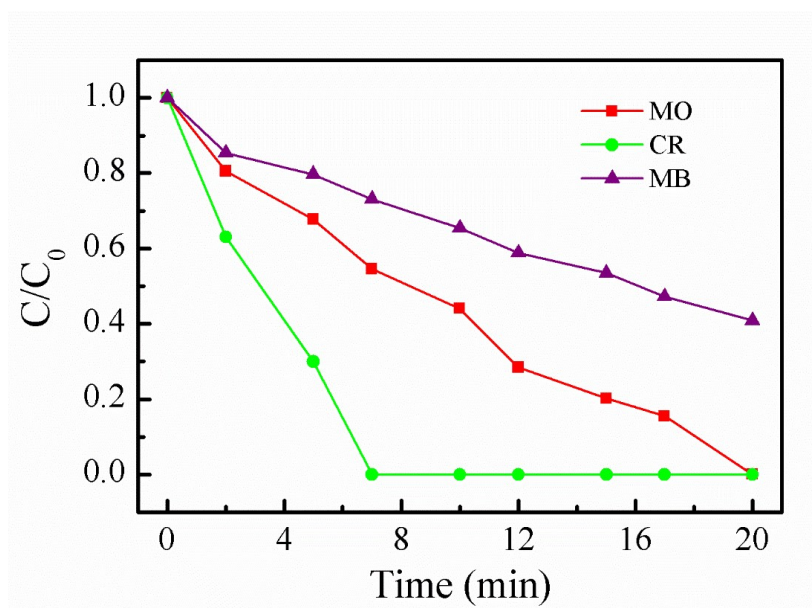

**Fig. S3.** The degradation curves of additional test pollutants: MO, CR and MB. (Reaction conditions: 25 °C; 100 mg/L PMS; 100 mg/L Co-M88A-FP catalyst; 20 mg/L pollutant; pH<sub>0</sub> 5.)

**Table S1.** Degradation rates of RhB by Co-M88A-FP and other reported MOF-based catalysts

| Material                                    | RhB degradation rate | Reference |
|---------------------------------------------|----------------------|-----------|
| Co-M88A-FP                                  | 100%                 | this work |
| novel stratiform Co-MOF                     | 95.3%                | [69]      |
| ZIF-67@CNFs                                 | 98.7%                | [70]      |
| ZnO/MIL-101(Fe)                             | 97.1%                | [71]      |
| MIL-88A                                     | 80%                  | [15]      |
| Mn <sub>3</sub> O <sub>4</sub> /ZIF-8       | 98%                  | [72]      |
| Co/Fe-PGC                                   | 99.41%               | [73]      |
| nanocellulose/Zn-MOF-based catalytic filter | more than 90%        | [74]      |
